# Supplementary material for: Calcein-Modified CeO2 for Intracellular ROS Detection: Mechanisms of Action and Cytotoxicity Analysis In Vitro
Source: MDPI journal article supplement (doi:10.3390/cells12192416), 2023-10-07
Supplement: s1 [file s1]

**Table S1.** The estimation of the genes expression in cultured cells by RT-PCR, and the primers used in the study.

| Function                             | Description                                                    | GeneBank  | Symbo<br>l | Forward 5'-3'           | Rewerse 5'-3'                |
|--------------------------------------|----------------------------------------------------------------|-----------|------------|-------------------------|------------------------------|
| <u>Glutathione Peroxidases (GPx)</u> | Glutathione peroxidase 1                                       | NM_000581 | GPX1       | CCTCCCCCTTACAGTGCTTGTC  | GCACACATGGCGCAATTG           |
|                                      | Glutathione peroxidase 2 (gastrointestinal)                    | NM_002083 | GPX2       | CCGATCCCAAGCTCATCATT    | TCTCAAAGTTCCAGGCCACAT        |
|                                      | Glutathione peroxidase 3 (plasma)                              | NM_002084 | GPX3       | CATCCCCCTTCAAGCAGTATGCT | GCCCGTCAGGCCTCAGTAG          |
|                                      | Glutathione peroxidase 4 (phospholipid hydroperoxidase)        | NM_002085 | GPX4       | CCGATACGCTGAGTGTGGTTT   | GCTCCTGCTTCCCGAACTG          |
|                                      | Glutathione peroxidase 5 (epididymal androgen-related protein) | NM_001509 | GPX5       | TCACCACACTCTCTTCCTGCAT  | AGAGTGGGAATTCTGGCAGTAT<br>G  |
|                                      | Glutathione S-transferase pi 1                                 | NM_000852 | GSTP1      | CAGGAGGGCTCACTCAAAGC    | GTGAGGTCTCCGTCTTGGA          |
|                                      | Glutathione transferase zeta 1                                 | NM_001513 | GSTZ1      | CCCAGAACGCCATCACTTG     | TGCCCGCTGTGCTCTGT            |
| <u>Peroxiredoxins (TPx)</u>          | Peroxiredoxin 1                                                | NM_002574 | PRDX1      | CTGGGACCCATGAACATTCC    | AAGACCCCATATCCTGAGCAA        |
|                                      | Peroxiredoxin 2                                                | NM_005809 | PRDX2      | TCCTTCGCCAGATCACTGTAA   | CAGCCGCAGAGCCTCATC           |
|                                      | Peroxiredoxin 3                                                | NM_006793 | PRDX3      | GCATTTGAGCGTCAACGATCT   | TCACCAAGCGGAGGGTTTC          |
|                                      | Peroxiredoxin 4                                                | NM_006406 | PRDX4      | GAGGCATCCCGGTATCG       | GGCTTGAAATCTTCGCTTTG         |
|                                      | Peroxiredoxin 5                                                | NM_181652 | PRDX5      | AGATGATTGCTGGTGTCCAT    | ACTATGCCATCCTGTACCACCA<br>T  |
|                                      | Peroxiredoxin 6                                                | NM_004905 | PRDX6      | GGCCGCATCCGTTTCC        | CCCGAGGGTGGGAGAAGA           |
| <u>Other Peroxidases</u>             | Catalase                                                       | NM_001752 | CAT        | CAGGGCATCAAAAACCTTTCTG  | CGGATGCCATAGTCAGGATCTT       |
|                                      | Cytochrome b-245, beta polypeptide                             | NM_000397 | CYBB       | CCTTTGAGTGGTTGCAGATCTG  | AGCCGGCATTGTTCTTTC           |
|                                      | Cytoglobin                                                     | NM_134268 | CYGB       | GCAGCACCTCGAGCAGAAG     | CCTTGGCACCCAGAAATGG          |
|                                      | Dual oxidase 1                                                 | NM_175940 | DUOX1      | TGAGCGGCACTTCCAGAAG     | GACGGCCAAAGTGGGTGAT          |
|                                      | Dual oxidase 2                                                 | NM_014080 | DUOX2      | CCTTCGAGCCCTTCTTCAACT   | CAGCTGAACACCCCGATCTT         |
|                                      | Lactoperoxidase                                                | NM_006151 | LPO        | CAAGCTTTTCCAGCCAACTCA   | CCGGCAACGCTGTGTGT            |
|                                      | Myeloperoxidase                                                | NM_000250 | MPO        | CCTGAAATTGGCGAGGAACT    | GCCGCCCATCCAGATGT            |
|                                      | Prostaglandin-endoperoxide synthase 1                          | NM_000962 | PTGS1      | TGTTCCGGTGCCAGTTCCAATA  | TGCCAGTGGTAGAGATGGTTGA       |
|                                      | Prostaglandin-endoperoxide synthase 2                          | NM_000963 | PTGS2      | AATTGCTGGCAGGGTTGCT     | GGTCAATGGAAGCCTGTGATAC<br>TT |
| <u>Other Antioxidants</u>            | Albumin                                                        | NM_000477 | ALB        | TGAGAAAACGCCAGTAAGTGACA | GAAAAGCATGGTCGCCTGTT         |
|                                      | Apolipoprotein E                                               | NM_000041 | APOE       | CTGCGTTGCTGGTCACATTC    | CTCTGTCTCCACCGCTTGCT         |

|                                                                     |                                                         |           |            |                              |                                |
|---------------------------------------------------------------------|---------------------------------------------------------|-----------|------------|------------------------------|--------------------------------|
|                                                                     | Glutathione reductase                                   | NM_000637 | GSR        | TGCAGGGACTTGGGTGTGA          | GCCTTCGTTGCTCCCATCT            |
|                                                                     | Metallothionein 3                                       | NM_005954 | MT3        | AGTGCGAGGGATGCAAATG          | GCCTTTGCACACACAGTCCTT          |
|                                                                     | Sulfiredoxin 1                                          | NM_080725 | SRXN1      | TGCTGTATCCCCAAGAATCATG       | GCTAGTTTGGCCCTTCCTCTTC         |
|                                                                     | Superoxide dismutase 1, soluble                         | NM_000454 | SOD1       | TGGTGTGGCCGATGTGTCT          | GTGCGGCCAATGATGCA              |
|                                                                     | Superoxide dismutase 2, mitochondrial                   | NM_000636 | SOD2       | TCCGCAGAAAGGAACATTAAGG       | TGACCTCCATTCTTTGCTCTCA         |
|                                                                     | Superoxide dismutase 3, extracellular                   | NM_003102 | SOD3       | GCGGAGCCCCAACTCTGACT         | TGCCAGATCTCCGTGACCTT           |
| Genes Involved in<br>Reactive Oxygen<br>Species (ROS)<br>Metabolism | Arachidonate 12-lipoxygenase                            | NM_000697 | ALOX1<br>2 | CCACCCACCACCAAGGAA           | TGCCGGACATCAGGTAGTGA           |
|                                                                     | Nitric oxide synthase 2, inducible                      | NM_000625 | NOS2       | CCGCATGACCTTGGTGTIT          | TCCAGCATCTCCTCCTGGTAGA         |
|                                                                     | NADPH oxidase 4                                         | NM_016931 | NOX4       | AAGAGCCCAGATTCCAAGCTAATT     | CGGCACAGTACAGGCACAAA           |
|                                                                     | NADPH oxidase, EF-hand calcium<br>binding domain 5      | NM_024505 | NOX5       | AGGCACCAGAAAAGAAAGCATAC<br>T | ATGTTGTCTTGGACACCTTCGAT        |
|                                                                     | Uncoupling protein 2 (mitochondrial,<br>proton carrier) | NM_003355 | UCP2       | CAGTTCTACACCAAGGGCTCTGA      | CCTGTGGTGCTGCCTGCTA            |
|                                                                     | Aldehyde oxidase 1                                      | NM_001159 | AOX1       | GGTGTTCCGTGTTTTTCGCTAT       | GGTCCATGCAGGCCTCTCT            |
|                                                                     | BCL2/adenovirus E1B 19kDa interacting<br>protein 3      | NM_004052 | BNIP3      | TCCATCTCTGCTGCTCTCTCATT      | AGGTTGTGACAGCGCTTCCA           |
|                                                                     | Epoxide hydrolase 2, cytoplasmic                        | NM_001979 | EPHX2      | AACTGGGCCTCTCTCAAGCA         | AGCCATGTACCACACCAGCAT          |
|                                                                     | MpV17 mitochondrial inner membrane<br>protein           | NM_002437 | MPV17      | TCTATGGCCTGCTGTGCAGTT        | GGACAACGGCCAACCTGTA            |
|                                                                     | ATX1 antioxidant protein 1 homolog<br>(yeast)           | NM_004045 | ATOX1      | TGCTTGCAACCCTGAAGAAA         | GGACCAGGCCCTGCTA               |
|                                                                     | Chemokine (C-C motif) ligand 5                          | NM_002985 | CCL5       | TGCATCTGCCTCCCCATATT         | AGTGGGCGGGCAATGTAG             |
|                                                                     | 24-dehydrocholesterol reductase                         | NM_014762 | DHCR2<br>4 | CATGCTGGTGCCCATGAAG          | GACGTGGATGTCGTTTTGGAA          |
|                                                                     | Forkhead box M1                                         | NM_021953 | FOXO1      | AGGAAACGCTGCCCATCTC          | CGTGAGCCTCCAGGATTGAG           |
|                                                                     | Ferritin, heavy polypeptide 1                           | NM_002032 | FTH1       | CTGGCTTGGCGGAATATCTCT        | GCCCGAGGCTTAGCTTTCAT           |
|                                                                     | Glutamate-cysteine ligase, modifier<br>subunit          | NM_002061 | GCLM       | CCGCCTGCGGAAGAAGT            | CATTCAAGGTTTTTTGGATACA<br>ATCA |
|                                                                     | Glutathione synthetase                                  | NM_000178 | GSS        | GCAGGAAAAGACACTCGTGATG       | CATGCTCGATGGCTTTGGT            |
|                                                                     | Heme oxygenase (decycling) 1                            | NM_002133 | HMOX<br>1  | TCCGATGGGTCCTTAACTCA         | GCCTGCATTACATGGCATA            |
|                                                                     | Heat shock 70kDa protein 1A                             | NM_005345 | HSPA1<br>A | GCTGATTGGCCGCAAGTT           | TGGAAAGGCCAGTGCTTCAT           |

|                                  |                                                                    |              |           |                            |                             |
|----------------------------------|--------------------------------------------------------------------|--------------|-----------|----------------------------|-----------------------------|
|                                  | Mannose-binding lectin (protein C) 2, soluble                      | NM_000242    | MBL2      | AGTGAAGGCCTTGTGTGTCAAGT    | TCCATTCTCTGCAGCATTCTCT      |
|                                  | NAD(P)H dehydrogenase, quinone 1                                   | NM_000903    | NQO1      | CAGCAGACGCCCCGAATTC        | TGGTGTCTCATCCCAAATATTCTC    |
|                                  | Ring finger protein 7                                              | NM_014245    | RNF7      | AAAGGAAAGAGCTCCAAATTGAA TC | CATAAGCATGCAAAAAGTTCTC TGA  |
|                                  | Sirtuin 2                                                          | NM_012237    | SIRT2     | GCTGGAACAGGAGGACTTGGT      | TGGCGCTGACGCAGTGT           |
|                                  | Sequestosome 1                                                     | NM_003900    | SQSTM1    | GGAAGGTGAAACACGGACACTT     | ACGTGGGCTCCAGTTTCCT         |
| Pathway Activity Signature Genes | Aldo-keto reductase family 1                                       | NM_001354    | AKR1C2    | GATTGCCCTGCGCTACCA         | TGTCTGATGCGCTGCTCATT        |
|                                  | BCL2-associated athanogene 2                                       | NM_004282    | BAG2      | CTCACCGTTGAAGTGTCAGTAGAA A | ATCAATAATCCTTGTGGCATGC T    |
|                                  | Four and a half LIM domains 2                                      | NM_001450    | FHL2      | CCTGCAGGAAGCAGCTGTCT       | AGTTCAGGCAGTAGGCAAAGTC A    |
|                                  | Galactosidase, alpha                                               | NM_000169    | GLA       | GGATGGCTCCCCAAAGAGAT       | GGCGAATCCCATGAGGAAA         |
|                                  | Heat shock protein 90kDa alpha (cytosolic), class A member 1       | NM_001017963 | HSP90AA1  | TTGGCAGTGAAGCATTTTTCAG     | GAGCACGTCGTGGGACAAA         |
|                                  | Phospholysine phosphohistidine inorganic pyrophosphate phosphatase | NM_022126    | LHPP      | TGCGCACCGGGAAGTT           | CACGTACCCATCAGCCTTCA        |
|                                  | Trafficking protein particle complex 6A                            | NM_024108    | TRAPP C6A | GGTGTTCAGAAAGCAGATGGA      | AGCTGTTGTCTTGCAGGACGTA      |
| Mitochondrial dysfunction        | Mitochondrial ribosomal protein L43                                | NM_176794    | MRPL43    | CAGTTGCACCGCAGATCCT        | GGAAGATCGGATGACTGAACT GA    |
|                                  | NADH dehydrogenase (ubiquinone) 1 beta subcomplex, 11, 17.3kDa     | NM_019056    | NDUF B11  | GCAGCACCTTTGTGGCCTAT       | TCCCATCCCACGCTCTTG          |
|                                  | Polymerase (RNA) mitochondrial (DNA directed)                      | NM_005035    | POLR MT   | CACAGGTGCTGGAAGGTTTCA      | CCGTACACCACCGTCATCAC        |
|                                  | Sirtuin 1                                                          | NM_012238    | SIRT1     | TGAGCCTGATGTTCCAGAGAGA     | AGCTTCATTAATTGCCTCTTGAT CAT |
|                                  | Sirtuin 3                                                          | NM_012239    | SIRT3     | CCAGTGGCATTCCAGACTTCA      | GATCGTACTGCTGGAGGTTGCT      |
|                                  | Transcription factor B1, mitochondrial                             | NM_016020    | TFB1M     | GCCATCGAGGGCTCAGAA         | CAGCCTGCCCCGTGCTTT          |
|                                  | Transcription factor B2, mitochondrial                             | NM_022366    | TFB2M     | AAGGCGTCTAAGGCCAGCTT       | TTTGCGCCAGGGTCTCA           |
|                                  | Copper chaperone for superoxide dismutase                          | NM_005125    | CCS       | GCCGCGCCATCTTCAG           | ATCAGGCTGCGGCCAAT           |

|                |                                                                         |                    |             |                               |                                                      |
|----------------|-------------------------------------------------------------------------|--------------------|-------------|-------------------------------|------------------------------------------------------|
|                | Selenoprotein P, plasma, 1                                              | NM_203472          | SELEN<br>OS | CTGAAACGGAAATCGGACAGA         | CGCCTCCTTCACCAGACAAC                                 |
| Anti Apoptotic | B-cell CLL/lymphoma 2                                                   | NM_000633.2        | BCL2        | CTGGGATGCCTTTGTGGAAC          | AGACAGCCAGGAGAAATCAAA<br>CAG                         |
|                | aculoviral IAP repeat containing 3                                      | NM_001165.4        | BIRC3       | GGACAGGAGTTCATCCGTCAAG        | TCTCCTGGGCTGTCTGATGTG                                |
|                | myeloid cell leukemia 1                                                 | NM_021960.4        | MCL1        | CACGAGACGGCCTTCCAA            | CACTCGAGACAACGATTTCACA<br>TC                         |
|                | TNF receptor-associated factor 2                                        | NM_021138.3        | TRAF2       | GGCCGTCTGTCCCAGTGAT           | TTCGTGGCAGCTCTCGTATTC                                |
| Autophagy      | autophagy related 3                                                     | NM_022488.4        | ATG3        | CCATTGAAAATCACCCATCATCTG      | CACCTCAGCATGCCTGCAT                                  |
|                | autophagy related 12                                                    | NM_004707.3        | ATG12       | CCCGGGAACAGAGGAACCT           | GGAGTGTCTCCACAGCCTTT                                 |
|                | nuclear factor of kappa light polypeptide<br>gene enhancer in B-cells 1 | NM_003998.3        | NFKB1       | GGCTACACCGAAGCAATTGAAG        | CAGCGAGTGGGCCTGAGA                                   |
|                | ribosomal protein S6 kinase, 70kDa,<br>polypeptide 1                    | NM_003161.3        | RPS6K<br>B1 | TGGCATAGAGCAGATGGATGTG        | AGAGTTCGGCTGTCGTATTGGA                               |
| Necrosis       | coiled-coil domain containing 103                                       | NM_213607.2        | CCDC1<br>03 | GCTGCAAGGGCTTGTTCAG           | GCCCCTCCTTCACGGATCT                                  |
|                | forkhead box I1                                                         | NM_012188.4        | FOXI1       | CGCCTCACTCTCAGCCAGAT          | CCGGCCTTGCTCTTGTTGTA                                 |
|                | junctophilin 3                                                          | NM_020655.3        | JPH3        | CCAGGATCACTGCCAAAGAGTT        | CGCTTCGGCCTCTGGTACT                                  |
|                | RAB25, member RAS oncogene family                                       | NM_020387.2        | RAB25       | TGTCTTCAAGGTGGTGCTGATC        | CGCGTGAATCGGGAGAGTAG                                 |
| Pro apoptotic  | BCL2-associated X protein                                               | NM_004324.3        | BAX         | GTGGCAGCTGACATGTTTTCTG        | GCAAAGTAGAAAAGGGCGACA<br>A                           |
|                | CD40 molecule, TNF receptor<br>superfamily member 5                     | NM_001250.4        | CD40        | ACACTGCCACCAGCACAAATACT       | CTGTTTCTGAGGTGCCCTTCTG                               |
|                | CASP8 and FADD-like apoptosis<br>regulator                              | NM_003879.5        | CFLAR       | GTGTGTATGGTGTGGATCAGACTC<br>A | GGCATGAATCTCCCATGAACA<br>AAAGCCACCCCAAGTTAGATCT<br>G |
|                | Fas cell surface death receptor                                         | NM_000043.4        | FAS         | GAATCATCAAGGAATGCACACTCA      |                                                      |
|                | Tumor necrosis factor receptor<br>superfamily, member 10a               | NM_003844.3        | TNFRS<br>F1 | CTGGCGCTTGGGTCTCCTA           | TGCGTTGCTCAGAATCTCGTT                                |
|                |                                                                         |                    |             |                               |                                                      |
| House keeping  | glyceraldehyde-3-phosphate<br>dehydrogenase                             | NM_002046.5        | GAPD<br>H   | GTGGAAGGACTCATGACCACAGT       | GCCATCACGCCACAGTTTC                                  |
|                | ribosomal protein, large, P0                                            | NM_001002.3        | RPLP0       | ATGCAGCAGATCCGCATGT           | TTGCGCATCATGGTGTTCTT                                 |
|                | beta-actin                                                              | XM_006715764<br>.1 | Actin       | TCGTGCGTGACATTAAGGAGAA        | AGCAGCCGTGGCCATCT                                    |

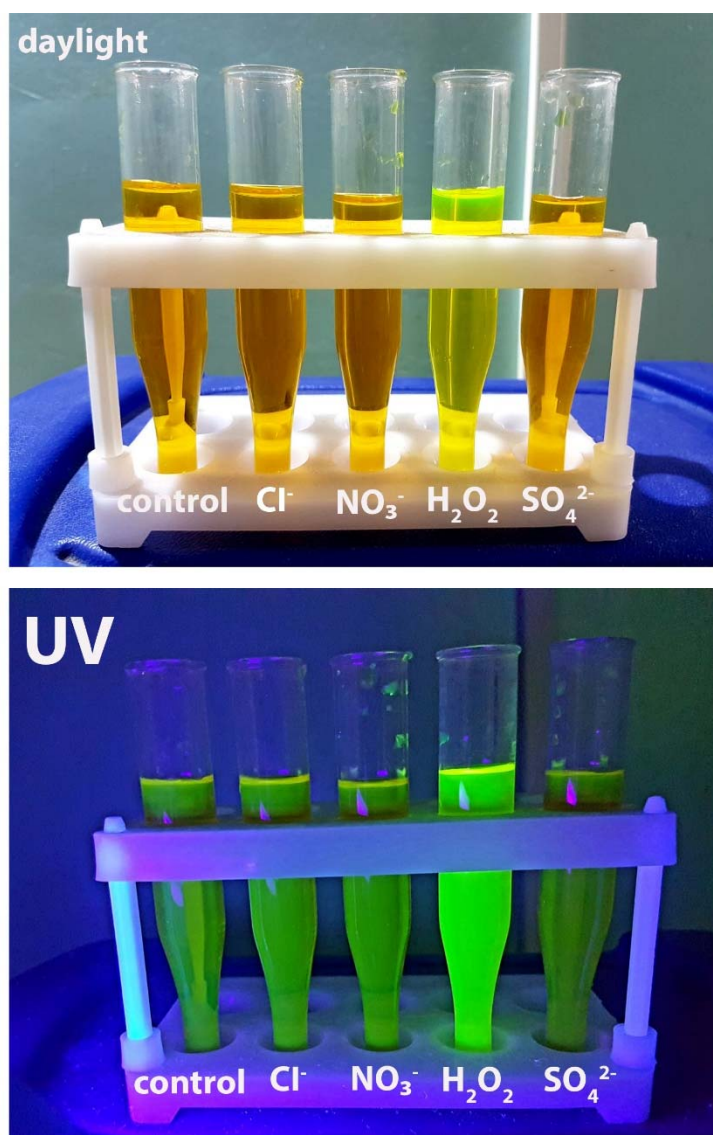

**Figure S1.** Analysis of the influence of various ions on the stability of the calcein-modified CeO<sub>2</sub> NPs.
